# Supplementary material for: Registration of histopathology to magnetic resonance imaging of prostate cancer
Source: PubMed Central journal article supplement (PMC8254194; doi:10.1016/j.phro.2021.03.004), 2021-04-12
Supplement: mmc1.pdf [file mmc1.pdf]

## SUPPLEMENTARY MATERIALS

**Table 1A:** Characteristics of the different images used in the image registration procedure.

|                                             | <i>In-vivo</i><br>Axial | <i>In-vivo</i><br>Coronal | <i>In-vivo</i><br>Sagittal | <i>Ex-vivo</i><br>Axial | Histopathology<br>(in MICE) | Registered<br>histopathology |
|---------------------------------------------|-------------------------|---------------------------|----------------------------|-------------------------|-----------------------------|------------------------------|
| <b>Repetition time (ms)</b>                 | 9946                    | 6133                      | 5793                       | 2500                    | -                           | -                            |
| <b>Echo time (ms)</b>                       | 103                     | 128                       | 128                        | 117                     | -                           | -                            |
| <b>Flip angle (°)</b>                       | 125                     | 111                       | 111                        | 111                     | -                           | -                            |
| <b>Number of averages (NEX)</b>             | 1                       | 3                         | 3                          | 15                      | -                           | -                            |
| <b>Slice thickness (mm)</b>                 | 2.5                     | 3                         | 3                          | 5                       | $5 \times 10^{-3}$          | 2.5                          |
| <b>In-plane pixel size (mm<sup>2</sup>)</b> | 0.410 x 0.410           | 0.469 x 0.469             | 0.469 x 0.469              | 0.195 x 0.195           | 0.015 x 0.015               | 0.1 x 0.1                    |
| <b>Matrix size</b>                          | 512 x 512               | 512 x 512                 | 512 x 512                  | 512 x 512               | 3840 x 1960                 | 2101 x 2101                  |

**Table 2A:** In-plane error (mm) of group 1 (14 patients with extraprostatic surgical margins) and group 2 (11 patients without extraprostatic surgical margins).

|                                                    | <b>Min</b> | <b>1st Qu.</b> | <b>Median</b> | <b>Mean</b> | <b>3dr Qu.</b> | <b>Max</b> | <b>SD</b> |
|----------------------------------------------------|------------|----------------|---------------|-------------|----------------|------------|-----------|
| <b>Group 1</b><br>(before deformable registration) | 0.2        | 1.4            | 2.1           | 2.3         | 3.2            | 4.4        | 1.8       |
| <b>Group 1</b><br>(after deformable registration)  | 0.4        | 1.2            | 1.8           | 2.0         | 2.6            | 4.8        | 1.1       |
| <b>Group 2</b><br>(before deformable registration) | 0.1        | 0.9            | 1.3           | 1.7         | 2.4            | 4.8        | 1.2       |
| <b>Group 2</b><br>(after deformable registration)  | 0.2        | 1.0            | 1.5           | 1.7         | 2.5            | 4.3        | 1.0       |

**Table 3A:** Summary of other publications performing co-registration of histopathology to *in-vivo* MRI and determine their method uncertainty based on comparing positions of landmarks.

| Publication                         | Registrations scheme                                                                                                                                                                                                                                                           | Evaluation method                                                                                                                                                                                       | Uncertainty                                             |
|-------------------------------------|--------------------------------------------------------------------------------------------------------------------------------------------------------------------------------------------------------------------------------------------------------------------------------|---------------------------------------------------------------------------------------------------------------------------------------------------------------------------------------------------------|---------------------------------------------------------|
| <b>Ward et al (2012)</b> [1]        | Landmarks-based (by extrinsic fiducial markers) comparing rigid and nonrigid thin-plate spline registration of histopathology to <i>in-vivo</i> MRI.                                                                                                                           | Euclidian distance between corresponding manually determined landmarks in the <i>in-vivo</i> T2w MRI and registered histopathology sections.                                                            | 2.3 ± 1.7 mm (rigid)<br>1.1 ± 0.7 mm (nonrigid)         |
| <b>Orczyk et al (2012)</b> [2]      | Landmark-based (by extrinsic fiducial markers) spatial registration (rigid and affine) of histopathology to <i>in-vivo</i> MRI.                                                                                                                                                | The mean root square distance across corresponding control points defined in the registered histopathology and <i>in-vivo</i> MRI.                                                                      | 2.89 mm (rigid)<br>1.59 mm (affine)                     |
| <b>Kalavagunta et al (2015)</b> [3] | Local affine transformation assisted by internal structures (IS) of histopathology to <i>in-vivo</i> MRI.                                                                                                                                                                      | Root mean squared distance between manually detected landmarks (independent from the ones used in the registration) defined in the <i>in-vivo</i> MRI and the native histopathology before transformed. | 1.54 ± 0.64 mm (with IS)<br>2.92 ± 1.76 mm (without IS) |
| <b>Reynolds et al (2015)</b> [4]    | Initial alignment followed by a deformable registration of <i>in-vivo</i> MRI to <i>ex-vivo</i> MRI.<br><br>Histopathology to <i>ex-vivo</i> MRI by a rigid registration followed by an initial control point alignment and automatic registration using similarity transform. | Mean distance between point features.<br><br>Quantitative assessment by computing the mean distance between control points after registration.                                                          | 3.2 ± 1.3 mm<br><br>0.57 ± 0.28 (0.06–1.99) mm          |
| <b>Uribe et al (2015)</b> [5]       | An affine and a nonrigid transform of the <i>in-vivo</i> MRI to histopathology. The nonrigid was used to correct for deformation due to the usage of endorectal coil during <i>in-vivo</i> MRI.                                                                                | Median distance between corresponding landmarks in the <i>in-vivo</i> MRI and registered histopathology sections.                                                                                       | 1.55 (0.3-3.1) mm                                       |
| <b>Dinh et al (2017)</b> [6]        | Deformable registration method based on selected landmarks.                                                                                                                                                                                                                    | Average distance between landmark in the <i>in-vivo</i> MRI and registered histopathology.                                                                                                              | 2.1 mm (dataset 1)<br>2.6 mm (dataset 2)                |
| <b>Li et al (2017)</b> [7]          | Multi-scale spectral embedding registration of histopathology to <i>in-vivo</i> MRI.                                                                                                                                                                                           | Root mean square distance between corresponding landmarks in registered histopathology and <i>in-vivo</i> MRI.                                                                                          | 2.96 ± 0.76 mm                                          |

#### REFERENCES

1. Ward AD, Crukley C, McKenzie CA, Montreuil J, Gibson E, Romagnoli C, et al. Prostate: registration of digital histopathologic images to in vivo MR images acquired by using endorectal receive coil. *Radiology*. 2012;263:856–864. <http://www.ncbi.nlm.nih.gov/pubmed/22474671>.
2. Orczyk C, Mikheev A, Rosenkrantz A, Melamed J, Taneja SS, Rusinek H. Imaging of prostate cancer: a platform for 3D co-registration of in-vivo MRI ex-vivo MRI and pathology. *Proc SPIE-the Int Soc Opt Eng*. 2012;8316:1–18. <http://proceedings.spiedigitallibrary.org/proceeding.aspx?doi=10.1117/12.911369>.
3. Kalavagunta C, Zhou X, Schmechel SC, Metzger GJ. Registration of in vivo prostate MRI and pseudo-whole mount histology using Local Affine Transformations guided by Internal Structures (LATIS). *J Magn Reson Imaging*. 2015;41:1104–1114.
4. Reynolds HM, Williams S, Zhang A, Chakravorty R, Rawlinson D, Ong CS, et al. Development of a registration framework to validate MRI with histology for prostate focal therapy. *Med Phys*. 2015;42:7078–7089.
5. Uribe CF, Jones EC, Chang SD, Goldenberg SL, Reinsberg SA, Kozlowski P. In vivo 3T and ex vivo 7T diffusion

tensor imaging of prostate cancer: Correlation with histology. Magn Reson Imaging. 2015;33:577–583.  
<http://www.ncbi.nlm.nih.gov/pubmed/25721995>.

6. Dinh CV, Steenbergen P, Ghobadi G, Poel H Van Der, Stijn WTPJ. Multicenter validation of prostate tumor localization using multiparametric MRI and prior knowledge. Med Phys. 2017;44:949–961.

<http://ovidsp.ovid.com/ovidweb.cgi?T=JS&PAGE=reference&D=emexa&NEWS=N&AN=615061982>.

7. Li L, Pahwa S, Penzias G, Rusu M, Gollamudi J, Viswanath S, et al. Co-Registration of ex vivo Surgical Histopathology and in vivo T2 weighted MRI of the Prostate via multi-scale spectral embedding representation. Sci Rep. 2017;7:1–12. <http://dx.doi.org/10.1038/s41598-017-08969-w>.

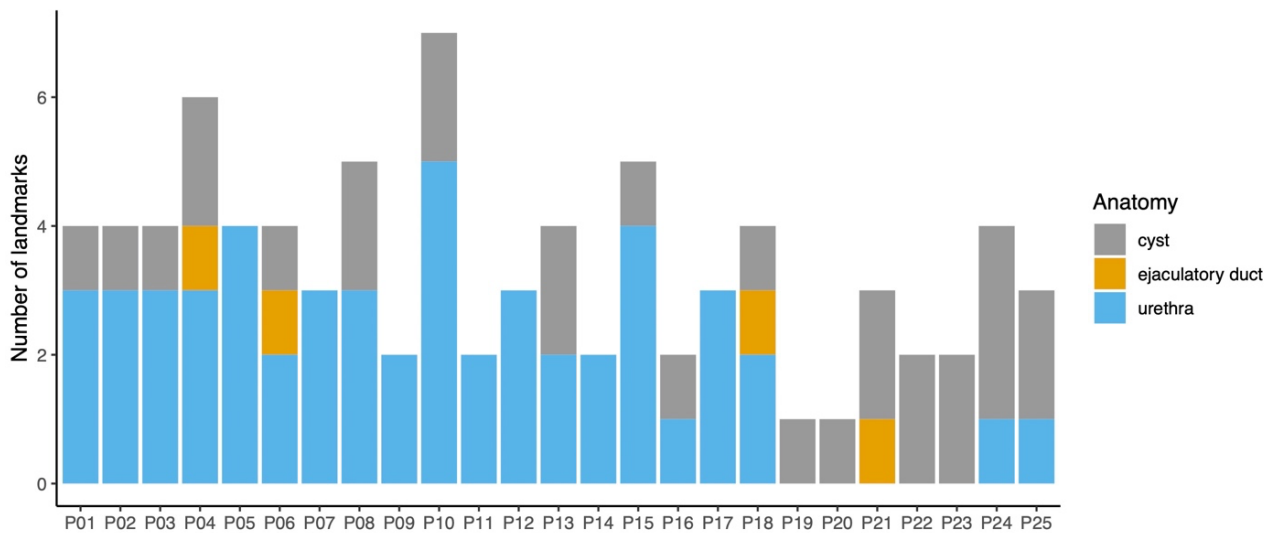

**Figure 1A:** Identified landmarks per patients and their anatomical location.
